# Supplementary material for: Activation of Heme Oxygenase Expression by Cobalt Protoporphyrin Treatment Prevents Pneumonic Plague Caused by Inhalation of Yersinia pestis
Source: PubMed Central journal article supplement (PMC7179272; doi:10.1128/aac.01819-19), 2020-03-24
Supplement: AAC.01819-19-s0001.pdf [file AAC.01819-19-s0001.pdf]

**Supplemental Information.**

**Table S1. Aerosol challenge dose for individual Sprague Dawley rats in pilot experiment (Figure S3).**

| Animal ID <sup>a</sup>            | Weight (g) | MV <sup>b</sup> (mL/min) | Time <sub>exp</sub> (min) | Neb Conc <sub>meas</sub> (CFU/mL) <sup>c</sup> | Aero Conc <sub>meas</sub> (CFU/mL) | Spray Factor | Dose <sub>delivered</sub> (CFU) |
|-----------------------------------|------------|--------------------------|---------------------------|------------------------------------------------|------------------------------------|--------------|---------------------------------|
| <b>Trial 1: males and females</b> |            |                          |                           |                                                |                                    |              |                                 |
| 1-01M                             | 407        | 190.29                   | 10                        | 4.00E+09                                       | 48                                 | 1.20E-08     | 9.13E+04                        |
| 1-02M                             | 452        | 205.86                   | 10                        | 4.00E+09                                       | 48                                 | 1.20E-08     | 9.88E+04                        |
| 1-03F                             | 240        | 128.05                   | 10                        | 4.00E+09                                       | 48                                 | 1.20E-08     | 6.15E+04                        |
| 1-04F                             | 207        | 114.60                   | 10                        | 4.00E+09                                       | 48                                 | 1.20E-08     | 5.50E+04                        |
| <b>Trial 2: males and females</b> |            |                          |                           |                                                |                                    |              |                                 |
| 1-01F                             | 253        | 133.22                   | 15                        | 1.68E+09                                       | 78.5                               | 4.67E-08     | 1.57E+05                        |
| 1-02F                             | 264        | 137.54                   | 15                        | 1.68E+09                                       | 78.5                               | 4.67E-08     | 1.62E+05                        |
| 1-03F                             | 263        | 137.15                   | 15                        | 1.68E+09                                       | 78.5                               | 4.67E-08     | 1.61E+05                        |
| 1-01M                             | 438        | 201.06                   | 15                        | 1.68E+09                                       | 78.5                               | 4.67E-08     | 2.37E+05                        |
| 1-02M                             | 430        | 198.30                   | 15                        | 1.68E+09                                       | 78.5                               | 4.67E-08     | 2.33E+05                        |
| 1-03M                             | 418        | 194.13                   | 15                        | 1.68E+09                                       | 78.5                               | 4.67E-08     | 2.29E+05                        |

a: ID: identification; M: male, F: female

b: MV: minute volume

c: Nebulizer concentration of *Y. pestis*, CFU: colony forming units

**Table S2. Aerosol challenge dose for individual Sprague Dawley rats for pre- and post-exposure efficacy study (Figure 5).**

| Animal ID                  | Weight (g) | MV (mL/min) | Time <sub>exp</sub> (min) | Neb Conc <sub>meas</sub> (CFU/mL) | Aero Conc <sub>meas</sub> (CFU/mL) | Spray Factor | Dose <sub>delivered</sub> (CFU) |
|----------------------------|------------|-------------|---------------------------|-----------------------------------|------------------------------------|--------------|---------------------------------|
| <b>Trial 1: All male</b>   |            |             |                           |                                   |                                    |              |                                 |
| 1-1M                       | 445        | 203.46      | 13                        | 2.50E+09                          | 100.0                              | 4.00E-08     | 2.65E+05                        |
| 1-2                        | 487        | 217.70      | 13                        | 2.50E+09                          | 100.0                              | 4.00E-08     | 2.83E+05                        |
| 1-3                        | 425        | 196.57      | 13                        | 2.50E+09                          | 100.0                              | 4.00E-08     | 2.56E+05                        |
| 1-4                        | 414        | 192.74      | 13                        | 2.50E+09                          | 100.0                              | 4.00E-08     | 2.51E+05                        |
| 1-5                        | 454        | 206.54      | 13                        | 2.50E+09                          | 100.0                              | 4.00E-08     | 2.69E+05                        |
| 1-6                        | 426        | 196.91      | 13                        | 2.50E+09                          | 100.0                              | 4.00E-08     | 2.56E+05                        |
| 1-7                        | 497        | 221.05      | 13                        | 2.50E+09                          | 100.0                              | 4.00E-08     | 2.87E+05                        |
| 1-8                        | 534        | 233.28      | 13                        | 2.50E+09                          | 100.0                              | 4.00E-08     | 3.03E+05                        |
| 1-9                        | 483        | 216.36      | 13                        | 2.50E+09                          | 100.0                              | 4.00E-08     | 2.81E+05                        |
| 1-10                       | 447        | 204.15      | 13                        | 2.50E+09                          | 100.0                              | 4.00E-08     | 2.65E+05                        |
| 1-11                       | 382        | 181.45      | 13                        | 2.50E+09                          | 100.0                              | 4.00E-08     | 2.36E+05                        |
| 1-12                       | 487        | 217.70      | 13                        | 2.50E+09                          | 100.0                              | 4.00E-08     | 2.83E+05                        |
| 1-13                       | 423        | 195.87      | 13                        | 2.50E+09                          | 100.0                              | 4.00E-08     | 2.55E+05                        |
| 1-14                       | 468        | 211.30      | 13                        | 2.50E+09                          | 100.0                              | 4.00E-08     | 2.75E+05                        |
| 1-15                       | 446        | 203.81      | 13                        | 2.50E+09                          | 100.0                              | 4.00E-08     | 2.65E+05                        |
| 1-16                       | 395        | 186.07      | 13                        | 2.50E+09                          | 100.0                              | 4.00E-08     | 2.42E+05                        |
| 1-17                       | 447        | 204.15      | 13                        | 2.50E+09                          | 100.0                              | 4.00E-08     | 2.65E+05                        |
| 1-18                       | 498        | 221.38      | 13                        | 2.50E+09                          | 100.0                              | 4.00E-08     | 2.88E+05                        |
| 1-19                       | 501        | 222.38      | 13                        | 2.50E+09                          | 100.0                              | 4.00E-08     | 2.89E+05                        |
| 1-20                       | 372        | 177.88      | 13                        | 2.50E+09                          | 100.0                              | 4.00E-08     | 2.31E+05                        |
| 1-21                       | 423        | 195.87      | 13                        | 2.50E+09                          | 100.0                              | 4.00E-08     | 2.55E+05                        |
| <b>Trial 2: All female</b> |            |             |                           |                                   |                                    |              |                                 |
| 1-1F                       | 290        | 147.58      | 13                        | 1.24E+09                          | 50.4                               | 4.06E-08     | 9.67E+04                        |
| 1-2                        | 279        | 143.36      | 13                        | 1.24E+09                          | 50.4                               | 4.06E-08     | 9.39E+04                        |
| 1-3                        | 277        | 142.59      | 13                        | 1.24E+09                          | 50.4                               | 4.06E-08     | 9.34E+04                        |
| 1-4                        | 292        | 148.34      | 13                        | 1.24E+09                          | 50.4                               | 4.06E-08     | 9.72E+04                        |
| 1-5                        | 248        | 131.24      | 13                        | 1.24E+09                          | 50.4                               | 4.06E-08     | 8.60E+04                        |
| 1-6                        | 286        | 146.05      | 13                        | 1.24E+09                          | 50.4                               | 4.06E-08     | 9.57E+04                        |
| 1-7                        | 253        | 133.22      | 13                        | 1.24E+09                          | 50.4                               | 4.06E-08     | 8.73E+04                        |
| 1-8                        | 260        | 135.97      | 13                        | 1.24E+09                          | 50.4                               | 4.06E-08     | 8.91E+04                        |
| 1-9                        | 271        | 140.26      | 13                        | 1.24E+09                          | 50.4                               | 4.06E-08     | 9.19E+04                        |
| 1-10                       | 250        | 132.03      | 13                        | 1.24E+09                          | 50.4                               | 4.06E-08     | 8.65E+04                        |
| 1-11                       | 294        | 149.10      | 13                        | 1.24E+09                          | 50.4                               | 4.06E-08     | 9.77E+04                        |
| 1-12                       | 248        | 131.24      | 13                        | 1.24E+09                          | 50.4                               | 4.06E-08     | 8.60E+04                        |
| 1-13                       | 272        | 140.65      | 13                        | 1.24E+09                          | 50.4                               | 4.06E-08     | 9.22E+04                        |
| 1-14                       | 257        | 134.79      | 13                        | 1.24E+09                          | 50.4                               | 4.06E-08     | 8.83E+04                        |

|                            |     |        |    |          |      |          |          |
|----------------------------|-----|--------|----|----------|------|----------|----------|
| 1-15                       | 270 | 139.88 | 13 | 1.24E+09 | 50.4 | 4.06E-08 | 9.16E+04 |
| 1-16                       | 280 | 143.74 | 13 | 1.24E+09 | 50.4 | 4.06E-08 | 9.42E+04 |
| 1-17                       | 253 | 133.22 | 13 | 1.24E+09 | 50.4 | 4.06E-08 | 8.73E+04 |
| 1-18                       | 240 | 128.05 | 13 | 1.24E+09 | 50.4 | 4.06E-08 | 8.39E+04 |
| 1-19                       | 246 | 130.44 | 13 | 1.24E+09 | 50.4 | 4.06E-08 | 8.55E+04 |
| 1-20                       | 262 | 136.76 | 13 | 1.24E+09 | 50.4 | 4.06E-08 | 8.96E+04 |
| 1-21                       | 269 | 139.49 | 13 | 1.24E+09 | 50.4 | 4.06E-08 | 9.14E+04 |
| <b>Trial 3: All male</b>   |     |        |    |          |      |          |          |
| 2-1M                       | 403 | 188.89 | 20 | 2.07E+09 | 82.8 | 4.00E-08 | 3.13E+05 |
| 2-2                        | 379 | 180.38 | 20 | 2.07E+09 | 82.8 | 4.00E-08 | 2.99E+05 |
| 2-3                        | 397 | 186.77 | 20 | 2.07E+09 | 82.8 | 4.00E-08 | 3.09E+05 |
| 2-4                        | 397 | 186.77 | 20 | 2.07E+09 | 82.8 | 4.00E-08 | 3.09E+05 |
| 2-5                        | 410 | 191.34 | 20 | 2.07E+09 | 82.8 | 4.00E-08 | 3.17E+05 |
| 2-6                        | 387 | 183.23 | 20 | 2.07E+09 | 82.8 | 4.00E-08 | 3.03E+05 |
| 2-7                        | 401 | 188.18 | 20 | 2.07E+09 | 82.8 | 4.00E-08 | 3.12E+05 |
| 2-8                        | 384 | 182.17 | 20 | 2.07E+09 | 82.8 | 4.00E-08 | 3.02E+05 |
| 2-9                        | 392 | 185.01 | 20 | 2.07E+09 | 82.8 | 4.00E-08 | 3.06E+05 |
| 2-10                       | 398 | 187.12 | 20 | 2.07E+09 | 82.8 | 4.00E-08 | 3.10E+05 |
| 2-11                       | 400 | 187.83 | 20 | 2.07E+09 | 82.8 | 4.00E-08 | 3.11E+05 |
| 2-12                       | 368 | 176.44 | 20 | 2.07E+09 | 82.8 | 4.00E-08 | 2.92E+05 |
| 2-13                       | 400 | 187.83 | 20 | 2.07E+09 | 82.8 | 4.00E-08 | 3.11E+05 |
| 2-14                       | 399 | 187.48 | 20 | 2.07E+09 | 82.8 | 4.00E-08 | 3.10E+05 |
| 2-15                       | 373 | 178.24 | 20 | 2.07E+09 | 82.8 | 4.00E-08 | 2.95E+05 |
| 2-16                       | 386 | 182.88 | 20 | 2.07E+09 | 82.8 | 4.00E-08 | 3.03E+05 |
| 2-17                       | 400 | 187.83 | 20 | 2.07E+09 | 82.8 | 4.00E-08 | 3.11E+05 |
| 2-18                       | 407 | 190.29 | 20 | 2.07E+09 | 82.8 | 4.00E-08 | 3.15E+05 |
| 2-19                       | 404 | 189.24 | 20 | 2.07E+09 | 82.8 | 4.00E-08 | 3.13E+05 |
| 2-20                       | 370 | 177.16 | 20 | 2.07E+09 | 82.8 | 4.00E-08 | 2.93E+05 |
| <b>Trial 4: All female</b> |     |        |    |          |      |          |          |
| 2-1F                       | 237 | 126.85 | 12 | 2.45E+09 | 98.0 | 4.00E-08 | 1.49E+05 |
| 2-2                        | 255 | 134.01 | 12 | 2.45E+09 | 98.0 | 4.00E-08 | 1.58E+05 |
| 2-3                        | 232 | 124.83 | 12 | 2.45E+09 | 98.0 | 4.00E-08 | 1.47E+05 |
| 2-4                        | 239 | 127.65 | 12 | 2.45E+09 | 98.0 | 4.00E-08 | 1.50E+05 |
| 2-5                        | 260 | 135.97 | 12 | 2.45E+09 | 98.0 | 4.00E-08 | 1.60E+05 |
| 2-6                        | 234 | 125.64 | 12 | 2.45E+09 | 98.0 | 4.00E-08 | 1.48E+05 |
| 2-7                        | 248 | 131.24 | 12 | 2.45E+09 | 98.0 | 4.00E-08 | 1.54E+05 |
| 2-8                        | 262 | 136.76 | 12 | 2.45E+09 | 98.0 | 4.00E-08 | 1.61E+05 |
| 2-9                        | 243 | 129.25 | 12 | 2.45E+09 | 98.0 | 4.00E-08 | 1.52E+05 |
| 2-10                       | 232 | 124.83 | 12 | 2.45E+09 | 98.0 | 4.00E-08 | 1.47E+05 |

|      |     |        |    |          |      |          |          |
|------|-----|--------|----|----------|------|----------|----------|
| 2-11 | 224 | 121.59 | 12 | 2.45E+09 | 98.0 | 4.00E-08 | 1.43E+05 |
| 2-12 | 239 | 127.65 | 12 | 2.45E+09 | 98.0 | 4.00E-08 | 1.50E+05 |
| 2-13 | 232 | 124.83 | 12 | 2.45E+09 | 98.0 | 4.00E-08 | 1.47E+05 |
| 2-14 | 243 | 129.25 | 12 | 2.45E+09 | 98.0 | 4.00E-08 | 1.52E+05 |
| 2-15 | 243 | 129.25 | 12 | 2.45E+09 | 98.0 | 4.00E-08 | 1.52E+05 |
| 2-16 | 260 | 135.97 | 12 | 2.45E+09 | 98.0 | 4.00E-08 | 1.60E+05 |
| 2-17 | 268 | 139.10 | 12 | 2.45E+09 | 98.0 | 4.00E-08 | 1.64E+05 |
| 2-18 | 250 | 132.03 | 12 | 2.45E+09 | 98.0 | 4.00E-08 | 1.55E+05 |
| 2-19 | 257 | 134.79 | 12 | 2.45E+09 | 98.0 | 4.00E-08 | 1.59E+05 |
| 2-20 | 230 | 124.03 | 12 | 2.45E+09 | 98.0 | 4.00E-08 | 1.46E+05 |

**Table S3. Aerosol challenge dose for individual Sprague Dawley rats for 48 hr/survival study (Figure 6).**

| Animal ID                | Weight (g) | MV (mL/min) | Time <sub>exp</sub> (min) | Neb Conc <sub>meas</sub> (CFU/mL) | Aero Conc <sub>meas</sub> (CFU/mL) | Spray Factor | Dose <sub>delivered</sub> (CFU) |
|--------------------------|------------|-------------|---------------------------|-----------------------------------|------------------------------------|--------------|---------------------------------|
| <b>Trial 1: All male</b> |            |             |                           |                                   |                                    |              |                                 |
| 1-01                     | 258        | 135.19      | 20                        | 4.00E+09                          | 83.8                               | 2.10E-08     | 2.27E+05                        |
| 1-02                     | 286        | 146.05      | 20                        | 4.00E+09                          | 83.8                               | 2.10E-08     | 2.45E+05                        |
| 1-03                     | 285        | 145.66      | 20                        | 4.00E+09                          | 83.8                               | 2.10E-08     | 2.44E+05                        |
| 1-04                     | 287        | 146.43      | 20                        | 4.00E+09                          | 83.8                               | 2.10E-08     | 2.45E+05                        |
| 1-05                     | 276        | 142.20      | 20                        | 4.00E+09                          | 83.8                               | 2.10E-08     | 2.38E+05                        |
| 1-06                     | 287        | 146.43      | 20                        | 4.00E+09                          | 83.8                               | 2.10E-08     | 2.45E+05                        |
| 1-07                     | 275        | 141.81      | 20                        | 4.00E+09                          | 83.8                               | 2.10E-08     | 2.38E+05                        |
| 1-08                     | 266        | 138.32      | 20                        | 4.00E+09                          | 83.8                               | 2.10E-08     | 2.32E+05                        |
| 1-09                     | 284        | 145.28      | 20                        | 4.00E+09                          | 83.8                               | 2.10E-08     | 2.43E+05                        |
| 1-10                     | 269        | 139.49      | 20                        | 4.00E+09                          | 83.8                               | 2.10E-08     | 2.34E+05                        |
| 1-11                     | 274        | 141.43      | 20                        | 4.00E+09                          | 83.8                               | 2.10E-08     | 2.37E+05                        |
| 1-12                     | 278        | 142.97      | 20                        | 4.00E+09                          | 83.8                               | 2.10E-08     | 2.40E+05                        |
| 1-13                     | 301        | 151.76      | 20                        | 4.00E+09                          | 83.8                               | 2.10E-08     | 2.54E+05                        |
| 1-14                     | 292        | 148.34      | 20                        | 4.00E+09                          | 83.8                               | 2.10E-08     | 2.49E+05                        |
| 1-15                     | 286        | 146.05      | 20                        | 4.00E+09                          | 83.8                               | 2.10E-08     | 2.45E+05                        |
| 1-16                     | 276        | 142.20      | 20                        | 4.00E+09                          | 83.8                               | 2.10E-08     | 2.38E+05                        |
| 1-17                     | 241        | 128.45      | 20                        | 4.00E+09                          | 83.8                               | 2.10E-08     | 2.15E+05                        |
| 1-18                     | 268        | 139.10      | 20                        | 4.00E+09                          | 83.8                               | 2.10E-08     | 2.33E+05                        |
| 1-19                     | 255        | 134.01      | 20                        | 4.00E+09                          | 83.8                               | 2.10E-08     | 2.25E+05                        |
| 1-20                     | 250        | 132.03      | 20                        | 4.00E+09                          | 83.8                               | 2.10E-08     | 2.21E+05                        |
| 1-21                     | 269        | 139.49      | 20                        | 4.00E+09                          | 83.8                               | 2.10E-08     | 2.34E+05                        |
| 1-22                     | 248        | 131.24      | 20                        | 4.00E+09                          | 83.8                               | 2.10E-08     | 2.20E+05                        |
| 1-23                     | 263        | 137.15      | 20                        | 4.00E+09                          | 83.8                               | 2.10E-08     | 2.30E+05                        |
| 1-24                     | 274        | 141.43      | 20                        | 4.00E+09                          | 83.8                               | 2.10E-08     | 2.37E+05                        |
| 1-25                     | 277        | 142.59      | 20                        | 4.00E+09                          | 83.8                               | 2.10E-08     | 2.39E+05                        |
| 1-26                     | 253        | 133.22      | 20                        | 4.00E+09                          | 83.8                               | 2.10E-08     | 2.23E+05                        |
| 1-27                     | 252        | 132.82      | 20                        | 4.00E+09                          | 83.8                               | 2.10E-08     | 2.23E+05                        |
| 1-28                     | 272        | 140.65      | 20                        | 4.00E+09                          | 83.8                               | 2.10E-08     | 2.36E+05                        |
| <b>Trial 2: All male</b> |            |             |                           |                                   |                                    |              |                                 |
| 2-01                     | 277        | 142.59      | 19                        | 4.60E+09                          | 1015.8                             | 2.21E-07     | 2.75E+06                        |

|                          |     |        |    |          |        |          |          |
|--------------------------|-----|--------|----|----------|--------|----------|----------|
| 2-02                     | 299 | 151.00 | 19 | 4.60E+09 | 1015.8 | 2.21E-07 | 2.91E+06 |
| 2-03                     | 250 | 132.03 | 19 | 4.60E+09 | 1015.8 | 2.21E-07 | 2.55E+06 |
| 2-04                     | 305 | 153.27 | 19 | 4.60E+09 | 1015.8 | 2.21E-07 | 2.96E+06 |
| 2-05                     | 297 | 150.24 | 19 | 4.60E+09 | 1015.8 | 2.21E-07 | 2.90E+06 |
| 2-06                     | 289 | 147.19 | 19 | 4.60E+09 | 1015.8 | 2.21E-07 | 2.84E+06 |
| 2-07                     | 317 | 157.77 | 19 | 4.60E+09 | 1015.8 | 2.21E-07 | 3.04E+06 |
| 2-08                     | 322 | 159.63 | 19 | 4.60E+09 | 1015.8 | 2.21E-07 | 3.08E+06 |
| 2-09                     | 296 | 149.86 | 19 | 4.60E+09 | 1015.8 | 2.21E-07 | 2.89E+06 |
| 2-10                     | 288 | 146.81 | 19 | 4.60E+09 | 1015.8 | 2.21E-07 | 2.83E+06 |
| 2-11                     | 263 | 137.15 | 19 | 4.60E+09 | 1015.8 | 2.21E-07 | 2.65E+06 |
| 2-12                     | 278 | 142.97 | 19 | 4.60E+09 | 1015.8 | 2.21E-07 | 2.76E+06 |
| 2-13                     | 275 | 141.81 | 19 | 4.60E+09 | 1015.8 | 2.21E-07 | 2.74E+06 |
| 2-14                     | 284 | 145.28 | 19 | 4.60E+09 | 1015.8 | 2.21E-07 | 2.80E+06 |
| 2-15                     | 338 | 165.54 | 19 | 4.60E+09 | 1015.8 | 2.21E-07 | 3.19E+06 |
| 2-16                     | 291 | 147.96 | 19 | 4.60E+09 | 1015.8 | 2.21E-07 | 2.86E+06 |
| 2-17                     | 272 | 148.72 | 19 | 4.60E+09 | 1015.8 | 2.21E-07 | 2.87E+06 |
| 2-18                     | 229 | 149.10 | 19 | 4.60E+09 | 1015.8 | 2.21E-07 | 2.88E+06 |
| 2-19                     | 285 | 142.59 | 19 | 4.60E+09 | 1015.8 | 2.21E-07 | 2.75E+06 |
| 2-20                     | 278 | 155.52 | 19 | 4.60E+09 | 1015.8 | 2.21E-07 | 3.00E+06 |
| 2-21                     | 317 | 152.89 | 19 | 4.60E+09 | 1015.8 | 2.21E-07 | 2.95E+06 |
| 2-22                     | 269 | 141.81 | 19 | 4.60E+09 | 1015.8 | 2.21E-07 | 2.74E+06 |
| 2-23                     | 265 | 152.13 | 19 | 4.60E+09 | 1015.8 | 2.21E-07 | 2.94E+06 |
| 2-24                     | 294 | 154.02 | 19 | 4.60E+09 | 1015.8 | 2.21E-07 | 2.97E+06 |
| 2-25                     | 273 | 138.32 | 19 | 4.60E+09 | 1015.8 | 2.21E-07 | 2.67E+06 |
| 2-26                     | 288 | 147.58 | 19 | 4.60E+09 | 1015.8 | 2.21E-07 | 2.85E+06 |
| 2-27                     | 287 | 155.90 | 19 | 4.60E+09 | 1015.8 | 2.21E-07 | 3.01E+06 |
| 2-28                     | 303 | 138.71 | 19 | 4.60E+09 | 1015.8 | 2.21E-07 | 2.68E+06 |
|                          |     |        |    |          |        |          |          |
| <b>Trial 3: All male</b> |     |        |    |          |        |          |          |
| 3-01                     | 269 | 139.49 | 20 | 3.80E+09 | 361.6  | 9.52E-08 | 1.01E+06 |
| 3-02                     | 255 | 134.01 | 20 | 3.80E+09 | 361.6  | 9.52E-08 | 9.69E+05 |
| 3-03                     | 282 | 144.51 | 20 | 3.80E+09 | 361.6  | 9.52E-08 | 1.05E+06 |
| 3-04                     | 280 | 143.74 | 20 | 3.80E+09 | 361.6  | 9.52E-08 | 1.04E+06 |
| 3-05                     | 330 | 162.59 | 20 | 3.80E+09 | 361.6  | 9.52E-08 | 1.18E+06 |
| 3-06                     | 303 | 152.51 | 20 | 3.80E+09 | 361.6  | 9.52E-08 | 1.10E+06 |

|      |     |        |    |          |       |          |          |
|------|-----|--------|----|----------|-------|----------|----------|
| 3-07 | 291 | 147.96 | 20 | 3.80E+09 | 361.6 | 9.52E-08 | 1.07E+06 |
| 3-08 | 293 | 148.72 | 20 | 3.80E+09 | 361.6 | 9.52E-08 | 1.08E+06 |
| 3-09 | 269 | 139.49 | 20 | 3.80E+09 | 361.6 | 9.52E-08 | 1.01E+06 |
| 3-10 | 340 | 166.28 | 20 | 3.80E+09 | 361.6 | 9.52E-08 | 1.20E+06 |
| 3-11 | 301 | 151.76 | 20 | 3.80E+09 | 361.6 | 9.52E-08 | 1.10E+06 |
| 3-12 | 273 | 141.04 | 20 | 3.80E+09 | 361.6 | 9.52E-08 | 1.02E+06 |
| 3-13 | 288 | 146.81 | 20 | 3.80E+09 | 361.6 | 9.52E-08 | 1.06E+06 |
| 3-14 | 320 | 158.88 | 20 | 3.80E+09 | 361.6 | 9.52E-08 | 1.15E+06 |
| 3-15 | 269 | 139.49 | 20 | 3.80E+09 | 361.6 | 9.52E-08 | 1.01E+06 |
| 3-16 | 304 | 152.89 | 20 | 3.80E+09 | 361.6 | 9.52E-08 | 1.11E+06 |
| 3-17 | 293 | 148.72 | 20 | 3.80E+09 | 361.6 | 9.52E-08 | 1.08E+06 |
| 3-18 | 294 | 149.10 | 20 | 3.80E+09 | 361.6 | 9.52E-08 | 1.08E+06 |
| 3-19 | 277 | 142.59 | 20 | 3.80E+09 | 361.6 | 9.52E-08 | 1.03E+06 |
| 3-20 | 311 | 155.52 | 20 | 3.80E+09 | 361.6 | 9.52E-08 | 1.12E+06 |
| 3-21 | 304 | 152.89 | 20 | 3.80E+09 | 361.6 | 9.52E-08 | 1.11E+06 |
| 3-22 | 275 | 141.81 | 20 | 3.80E+09 | 361.6 | 9.52E-08 | 1.03E+06 |
| 3-23 | 302 | 152.13 | 20 | 3.80E+09 | 361.6 | 9.52E-08 | 1.10E+06 |
| 3-24 | 307 | 154.02 | 20 | 3.80E+09 | 361.6 | 9.52E-08 | 1.11E+06 |
| 3-25 | 266 | 138.32 | 20 | 3.80E+09 | 361.6 | 9.52E-08 | 1.00E+06 |
| 3-26 | 290 | 147.58 | 20 | 3.80E+09 | 361.6 | 9.52E-08 | 1.07E+06 |
| 3-27 | 312 | 155.90 | 20 | 3.80E+09 | 361.6 | 9.52E-08 | 1.13E+06 |
| 3-28 | 267 | 138.71 | 20 | 3.80E+09 | 361.6 | 9.52E-08 | 1.00E+06 |



## Supplemental Information.

Figure S1

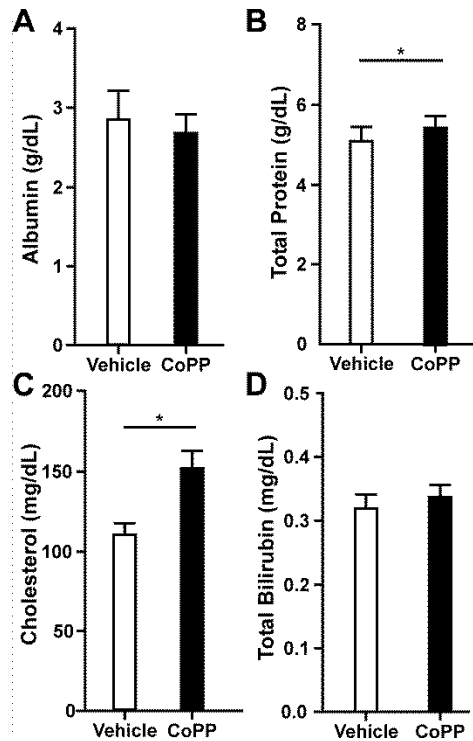

**Supplemental Figure S1.** *Liver function enzymes suggest negative impact of CoPP on the liver during *Y. pestis* infection.* Liver function tests were conducted on serum collected from vehicle and CoPP-treated mice at 72 HPI. (A) Albumin, (B) total protein, (C) cholesterol, and (D) bilirubin are shown (the remaining enzymes in the Liver Panel, ALP, ALT and AST, were shown in Figure 4). Data shown depict the mean and standard error of the mean. Data were collected in 4 independent trials, n=20 (vehicle) or 22 (CoPP), and analyzed by Student's t-test, \*P<0.05.

**Figure S2.**

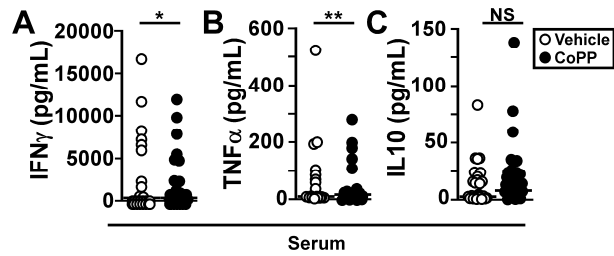

**Supplemental Figure S2.** *Loss of protection in CoPP-treated mice is associated with increased serum cytokines.* Cytokine analysis of serum samples collected at 72 HPI (remainder shown in figure 4). Serum was analyzed for the following proteins by Multiplex: (A) IFN $\gamma$ ; (B) TNF $\alpha$ ; (C) IL10. Bars indicate median. Data shown were collected in 2-4 independent trials, and were analyzed for statistical significance by Mann Whitney test comparing treated to untreated, \*P<0.05.

**Figure S3.**

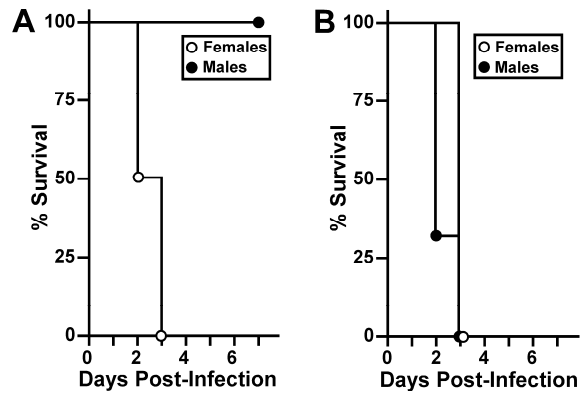

**Supplemental Figure S3.** *Challenge dose determination for Sprague Dawley rats.* A pilot challenge study was conducted to determine dosing. *Y. pestis* CO92 was prepared for aerosolization as described in the methods and delivered to groups of 2-3 age-matched female (open circles, weighing 210-265g) and male (closed circles, weighing 410-450g) Sprague Dawley rats by inhalation exposure. In cohort 1 (A), females received a mean presented dose of  $5.5 \times 10^4$  CFU and males received a mean dose of  $9.5 \times 10^4$  CFU; in cohort 2 (B), females received  $1.6 \times 10^5$  CFU, males received  $2.3 \times 10^5$  CFU. Individual animal doses shown in Supplemental Table S1. Survival was monitored over a 7 day observation period.

**Figure S4.**

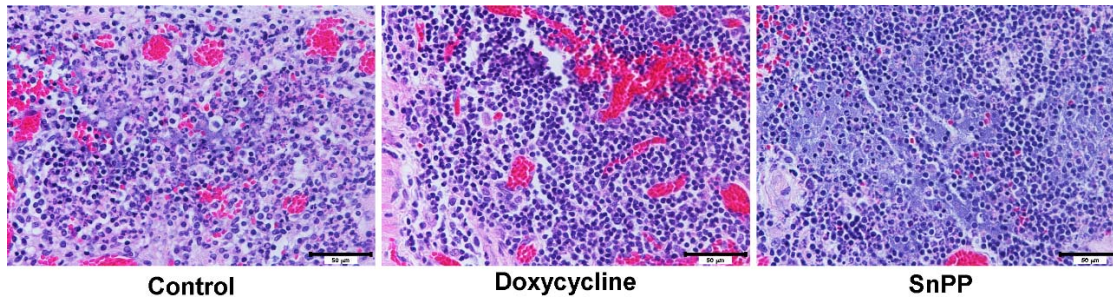

**Supplemental Figure S4.** *Post-mortem analysis of male rats indicates severe pneumonic disease.* Groups of 28 (n=7 per group) male Sprague-Dawley rats were challenged by inhalation exposure to *Y. pestis* CO92. Study design: Rats were pre-treated with 5mg/kg CoPP (CoPP+Dx) or SnPP (SnPP+Dx) IP on days -1, 0, +2, and +4; doxycycline (Dx) treatment (20mg/kg IG) began 24 HPI and continued once daily for 7 days. Vehicle control animals received PBS by IP injection and water by oral gavage (control). Animals that succumbed to disease were necropsied and the lungs inflated with 10% formalin, sectioned, then processed for hematoxylin and eosin (H&E) staining: Control group (left), Dx (center), or Doxycycline+SnPP treatment (right). Scale bar indicates 50 $\mu$ m. Data shown were collected from one trial.
